# Supplementary material for: Mutation landscape of SARS-CoV-2 reveals five mutually exclusive clusters of leading and trailing single nucleotide substitutions
Source: bioRxiv or medRxiv preprint supplement (doi:10.1101/2020.05.07.082768), 2020-07-27
Supplement: Supplementary file [file media-2.pdf]

Supplementary Figure S2

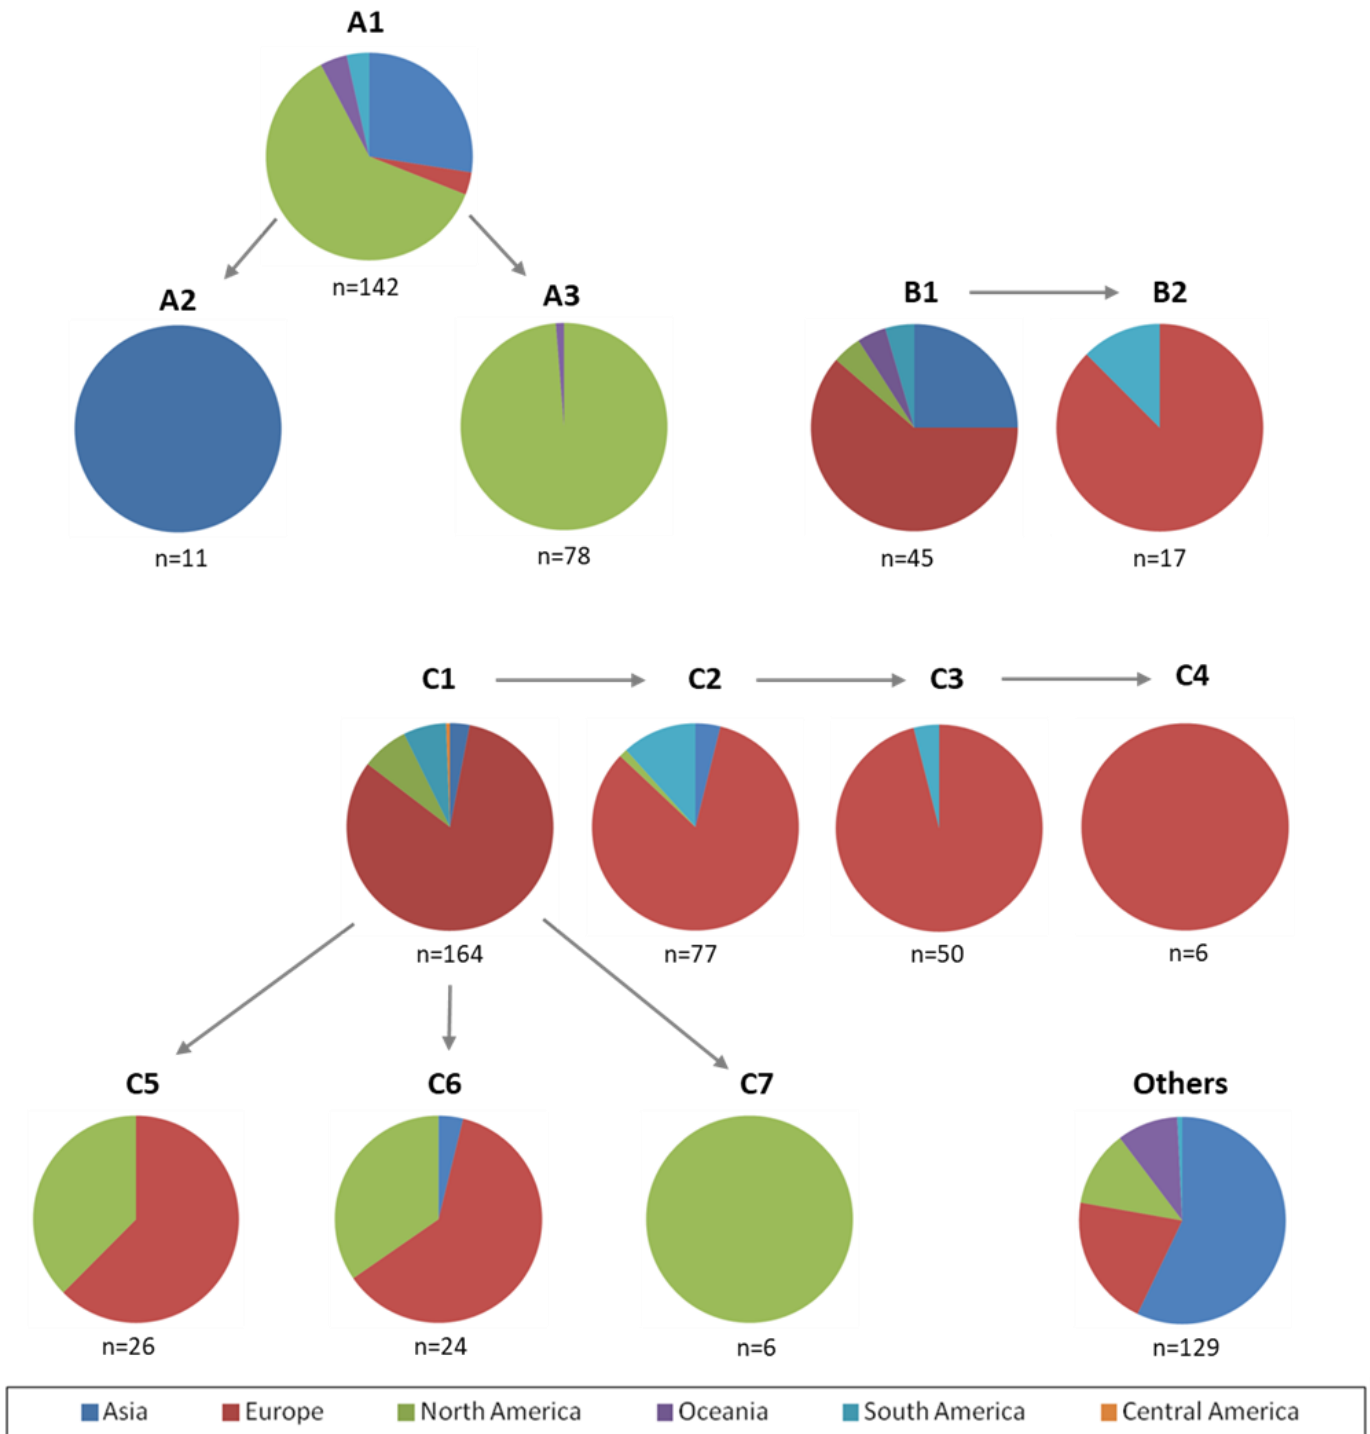

Supplementary Figure S2. Geographical distribution of the three mutually exclusive lineages of SARS-CoV-2. The pie diagrams represent the geographic distribution of the SARS-CoV2 lineages A1 (A1-A3), B1 (B1 & B2) and C1 (C1-C7).
