# Supplementary material for: Mutation landscape of SARS-CoV-2 reveals five mutually exclusive clusters of leading and trailing single nucleotide substitutions
Source: bioRxiv or medRxiv preprint supplement (doi:10.1101/2020.05.07.082768), 2020-07-27
Supplement: Supplementary file [file media-3.pdf]

Supplementary Figure S3

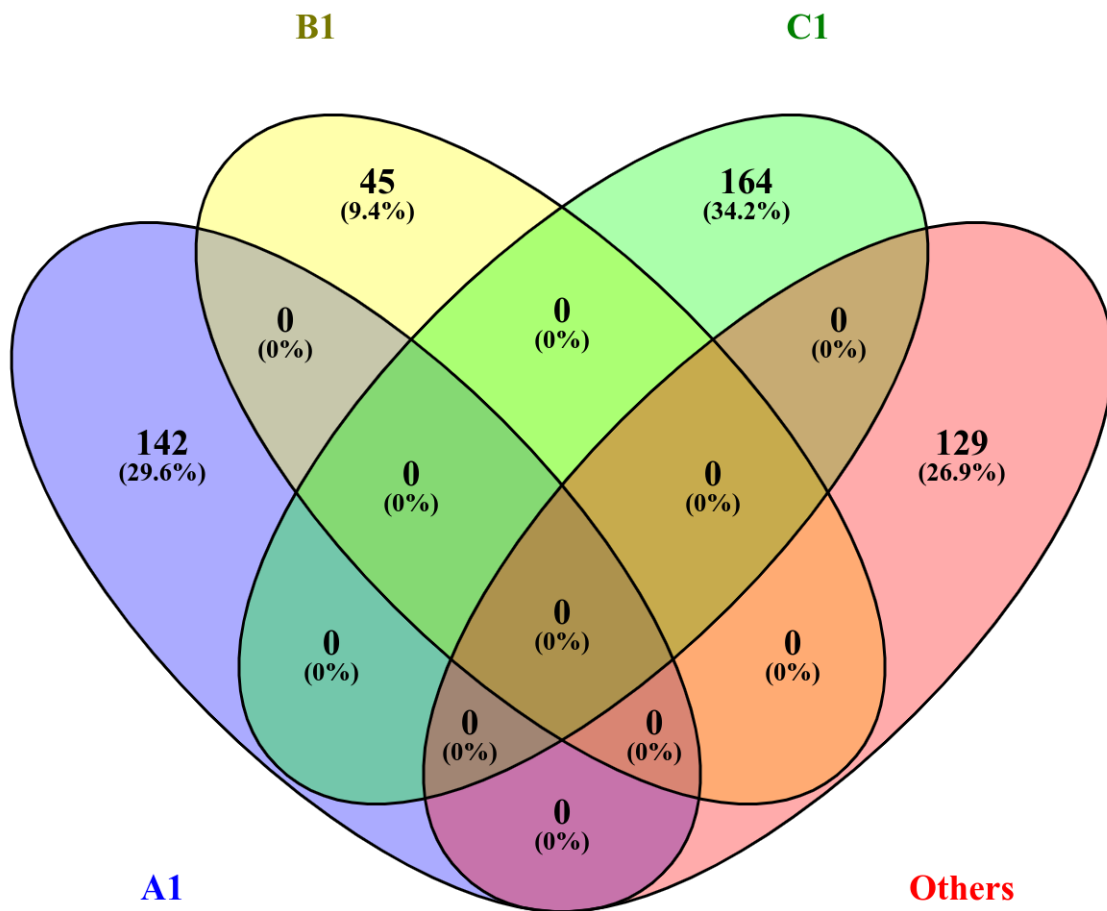

**Supplementary Figure 3. The three lineage-defining mutations A1, B1 & C1 are mutually exclusive.** A Venn diagram showing the non-overlapping nature of the lineage-defining mutations generated by Venny 2.1 36 server (<https://bioinfoqp.cnb.csic.es/tools/venny/>)
