# Supplementary material for: Mutation landscape of SARS-CoV-2 reveals five mutually exclusive clusters of leading and trailing single nucleotide substitutions
Source: bioRxiv or medRxiv preprint supplement (doi:10.1101/2020.05.07.082768), 2020-07-27
Supplement: Supplementary file [file media-4.pdf]

**Supplementary Table S1. Chronological order of the first appearance of mutations in SARS-CoV-2.** The 38 substitutions/mutations in the SARS-CoV-2 genomes (including G29742A and G29742T) are arranged in their order of appearance with details on date and geographic location of the first reported sequence.

| Sl. No. | Mutation | %    | Accession number | Date of first appearance | Geography                                        |
|---------|----------|------|------------------|--------------------------|--------------------------------------------------|
| 1       | C8782T   | 29.1 | EPI_ISL_406801   | 5-Jan-20                 | Asia / China / Hubei / Wuhan                     |
| 2       | T28144C  | 29.5 | EPI_ISL_406801   | 5-Jan-20                 | Asia / China / Hubei / Wuhan                     |
| 3       | C29095T  | 2.4  | EPI_ISL_406030   | 10-Jan-20                | Asia / China / Guangdong / Shenzhen              |
| 4       | C24034T  | 1.2  | EPI_ISL_410301   | 13-Jan-20                | Asia / Nepal / Kathmandu                         |
| 5       | G11083A  | 12   | EPI_ISL_408480   | 17-Jan-20                | Asia / China / Yunnan / Kunming                  |
| 6       | G1397A   | 3.3  | EPI_ISL_412981   | 18-Jan-20                | Asia / China / Hubei / Wuhan                     |
| 7       | T28688C  | 3.3  | EPI_ISL_412981   | 18-Jan-20                | Asia / China / Hubei / Wuhan                     |
| 8       | G29742T  | 3.2  | EPI_ISL_412981   | 18-Jan-20                | Asia / China / Hubei / Wuhan                     |
| 9       | C18060T  | 17.5 | EPI_ISL_404895   | 19-Jan-20                | N. America / USA / Washington / Snohomish County |
| 10      | C17373T  | 1.4  | EPI_ISL_411066   | 22-Jan-20                | Asia / China / Fujian                            |
| 11      | C15324T  | 2.4  | EPI_ISL_406533   | 22-Jan-20                | Asia / China / Guangdong / Guangzhou             |
| 12      | G22661T  | 1.2  | EPI_ISL_412028   | 22-Jan-20                | Asia / Hong Kong                                 |
| 13      | G26144T  | 9.4  | EPI_ISL_406036   | 22-Jan-20                | North America / USA / California / Orange County |
| 14      | T4402C   | 2.4  | EPI_ISL_407193   | 25-Jan-20                | Asia / South Korea / Gyeonggi-do                 |
| 15      | G5062T   | 2.4  | EPI_ISL_407193   | 25-Jan-20                | Asia / South Korea / Gyeonggi-do                 |
| 16      | C241T    | 34.8 | EPI_ISL_406862   | 28-Jan-20                | Europe / Germany / Bavaria / Munich              |
| 17      | C3037T   | 35.2 | EPI_ISL_406862   | 28-Jan-20                | Europe / Germany / Bavaria / Munich              |
| 18      | A23403G  | 35.2 | EPI_ISL_406862   | 28-Jan-20                | Europe / Germany / Bavaria / Munich              |
| 19      | G28878A  | 1.8  | EPI_ISL_407894   | 28-Jan-20                | Oceania / Australia / Queensland / Gold Coast    |
| 20      | G29742A  | 3.2  | EPI_ISL_407894   | 28-Jan-20                | Oceania / Australia / Queensland / Gold Coast    |
| 21      | C14805T  | 5.9  | EPI_ISL_412116   | 9-Feb-20                 | Europe / United Kingdom / England                |
| 22      | C14408T  | 34.8 | EPI_ISL_412973   | 20-Feb-20                | Europe / Italy / Lombardy                        |
| 23      | C17747T  | 16.1 | EPI_ISL_413456   | 20-Feb-20                | North America / USA / Washington / King County   |
| 24      | A17858G  | 16.3 | EPI_ISL_413456   | 20-Feb-20                | North America / USA / Washington / King County   |
| 25      | G28881A  | 16.5 | EPI_ISL_412912   | 25-Feb-20                | Europe / Germany / Baden-Wuerttemberg            |
| 26      | G28882A  | 16.5 | EPI_ISL_412912   | 25-Feb-20                | Europe / Germany / Baden-Wuerttemberg            |
| 27      | G28883C  | 16.5 | EPI_ISL_412912   | 25-Feb-20                | Europe / Germany / Baden-Wuerttemberg            |
| 28      | T17247C  | 3.5  | EPI_ISL_413016   | 28-Feb-20                | South America / Brazil / Sao Paulo / Sao Paulo   |
| 29      | T514C    | 1.4  | EPI_ISL_413581   | 29-Feb-20                | Europe / Netherlands / Oss                       |
| 30      | C1059T   | 4.9  | EPI_ISL_413572   | 1-Mar-20                 | Europe / Netherlands / Haarlem                   |
| 31      | G25563T  | 5.3  | EPI_ISL_413572   | 1-Mar-20                 | Europe / Netherlands / Haarlem                   |
| 32      | C27046T  | 10.6 | EPI_ISL_414560   | 3-Mar-20                 | Europe / Netherlands / Zuid Holland              |
| 33      | G1440A   | 1.2  | EPI_ISL_414426   | 3-Mar-20                 | Europe / Netherlands / Limburg                   |
| 34      | G2891A   | 1.2  | EPI_ISL_414426   | 3-Mar-20                 | Europe / Netherlands / Limburg                   |
| 35      | G3145T   | 1.6  | EPI_ISL_414562   | 3-Mar-20                 | Europe / Netherlands / Zuid Holland              |
| 36      | C2416T   | 1.2  | EPI_ISL_414633   | 4-Mar-20                 | Europe / France / Ile-de-France / Pontoise       |
| 37      | C22277A  | 1.2  | EPI_ISL_414641   | 5-Mar-20                 | Europe / Finland                                 |
| 38      | G29553A  | 1.2  | EPI_ISL_414616   | 8-Mar-20                 | North America / USA / Washington / Kirkland      |
