# Supplementary material for: Mutation landscape of SARS-CoV-2 reveals five mutually exclusive clusters of leading and trailing single nucleotide substitutions
Source: bioRxiv or medRxiv preprint supplement (doi:10.1101/2020.05.07.082768), 2020-07-27
Supplement: Supplementary file [file media-5.pdf]

**Supplementary Table S2. Accession IDs of all SARS-CoV-2 sequences downloaded from GISAID.** GSAID Accession IDs of all the SARS-CoV-2 genome sequences used in the study as part of the four sequentially downloaded datasets.

| Accession_ID   | Virus name entry                                | Date of Collection | Datasets |    |    |    |
|----------------|-------------------------------------------------|--------------------|----------|----|----|----|
|                |                                                 |                    | 1        | 2  | 3  | 4  |
| EPI_ISL_402119 | BETACOV/WUHAN/IVDC-HB-01/2019 EPI_ISL_402119    | 30/12/2019         | 1        | -  | -  | -  |
| EPI_ISL_402120 | BETACOV/WUHAN/IVDC-HB-04/2020 EPI_ISL_402120    | 1/1/2020           | 2        | 1  | 1  | 1  |
| EPI_ISL_402121 | BETACOV/WUHAN/IVDC-HB-05/2019 EPI_ISL_402121    | 30/12/2019         | 3        | 2  | 2  | 2  |
| EPI_ISL_402123 | BETACOV/WUHAN/IPBCAMS-WH-01/2019 EPI_ISL_402123 | 24/12/2019         | 4        | 3  | 3  | 3  |
| EPI_ISL_402124 | BETACOV/WUHAN/WIV04/2019 EPI_ISL_402124         | 30/12/2019         | 5        | 4  | 4  | 4  |
| EPI_ISL_402125 | BETACOV/WUHAN-HU-1/2019 EPI_ISL_402125          | 31/12/2019         | 6        | 5  | 5  | 5  |
| EPI_ISL_402127 | BETACOV/WUHAN/WIV02/2019 EPI_ISL_402127         | 30/12/2019         | 7        | 6  | 6  | 6  |
| EPI_ISL_402128 | BETACOV/WUHAN/WIV05/2019 EPI_ISL_402128         | 30/12/2019         | 8        | 7  | 7  | 7  |
| EPI_ISL_402129 | BETACOV/WUHAN/WIV06/2019 EPI_ISL_402129         | 30/12/2019         | 9        | 8  | 8  | 8  |
| EPI_ISL_402130 | BETACOV/WUHAN/WIV07/2019 EPI_ISL_402130         | 30/12/2019         | -        | 9  | 9  | 9  |
| EPI_ISL_402132 | BETACOV/WUHAN/HBCDC-HB-01/2019 EPI_ISL_402132   | 30/12/2019         | 10       | 10 | 10 | 10 |
| EPI_ISL_403928 | BETACOV/WUHAN/IPBCAMS-WH-05/2020 EPI_ISL_403928 | 01/1/2020          | 11       | 11 | 11 | 11 |
| EPI_ISL_403929 | BETACOV/WUHAN/IPBCAMS-WH-04/2019 EPI_ISL_403929 | 30/12/2019         | 12       | 12 | 12 | 12 |
| EPI_ISL_403930 | BETACOV/WUHAN/IPBCAMS-WH-03/2019 EPI_ISL_403930 | 30/12/2019         | 13       | 13 | 13 | 13 |
| EPI_ISL_403931 | BETACOV/WUHAN/IPBCAMS-WH-02/2019 EPI_ISL_403931 | 30/12/2019         | -        | 14 | 14 | 14 |
| EPI_ISL_403932 | BETACOV/GUANGDONG/20SF012/2020 EPI_ISL_403932   | 14/1/2020          | 14       | 15 | 15 | 15 |
| EPI_ISL_403933 | BETACOV/GUANGDONG/20SF013/2020 EPI_ISL_403933   | 15/1/2020          | 15       | 16 | 16 | 16 |
| EPI_ISL_403934 | BETACOV/GUANGDONG/20SF014/2020 EPI_ISL_403934   | 15/1/2020          | 16       | 17 | 17 | 17 |
| EPI_ISL_403935 | BETACOV/GUANGDONG/20SF025/2020 EPI_ISL_403935   | 22/1/2020          | 17       | 18 | -  | 18 |
| EPI_ISL_403936 | BETACOV/GUANGDONG/20SF028/2020 EPI_ISL_403936   | 17/1/2020          | 18       | 19 | 18 | 19 |
| EPI_ISL_403937 | BETACOV/GUANGDONG/20SF040/2020 EPI_ISL_403937   | 18/1/2020          | 19       | 20 | 19 | 20 |
| EPI_ISL_403962 | BETACOV/NONTHABURI/61/2020 EPI_ISL_403962       | 8/1/2020           | 20       | 21 | 20 | 21 |
| EPI_ISL_403963 | BETACOV/NONTHABURI/74/2020 EPI_ISL_403963       | 13/1/2020          | 21       | 22 | 21 | 22 |
| EPI_ISL_404227 | BETACOV/ZHEJIANG/WZ-01/2020 EPI_ISL_404227      | 16/1/2020          | 22       | 23 | 22 | 23 |
| EPI_ISL_404228 | BETACOV/ZHEJIANG/WZ-02/2020 EPI_ISL_404228      | 17/1/2020          | 23       | 24 | 23 | 24 |
| EPI_ISL_404253 | BETACOV/USA/IL1/2020 EPI_ISL_404253             | 21/1/2020          | 24       | 25 | 24 | 25 |
| EPI_ISL_404895 | BETACOV/USA/WA1/2020 EPI_ISL_404895             | 19/1/2020          | 25       | 26 | 25 | 26 |
| EPI_ISL_405839 | BETACOV/SHENZHEN/HKU-SZ-005/2020 EPI_ISL_405839 | 11/1/2020          | 26       | 27 | 26 | 27 |
| EPI_ISL_406030 | BETACOV/SHENZHEN/HKU-SZ-002/2020 EPI_ISL_406030 | 10/1/2020          | 27       | 28 | 27 | 28 |
| EPI_ISL_406031 | BETACOV/TAIWAN/2/2020 EPI_ISL_406031            | 23/1/2020          | 28       | 29 | 28 | 29 |
| EPI_ISL_406034 | BETACOV/USA/CA1/2020 EPI_ISL_406034             | 23/1/2020          | 29       | 30 | 29 | 30 |
| EPI_ISL_406036 | BETACOV/USA/CA2/2020 EPI_ISL_406036             | 22/1/2020          | 30       | 31 | 30 | 31 |
| EPI_ISL_406223 | BETACOV/USA/AZ1/2020 EPI_ISL_406223             | 22/1/2020          | 31       | 32 | 31 | 32 |
| EPI_ISL_406531 | BETACOV/GUANGDONG/20SF174/2020 EPI_ISL_406531   | 22/1/2020          | 32       | 33 | 32 | 33 |
| EPI_ISL_406533 | BETACOV/GUANGZHOU/20SF206/2020 EPI_ISL_406533   | 22/1/2020          | 33       | 34 | 33 | 34 |
| EPI_ISL_406534 | BETACOV/FOSHAN/20SF207/2020 EPI_ISL_406534      | 22/1/2020          | 34       | 35 | 34 | 35 |
| EPI_ISL_406535 | BETACOV/FOSHAN/20SF210/2020 EPI_ISL_406535      | 22/1/2020          | 35       | 36 | 35 | 36 |
| EPI_ISL_406536 | BETACOV/FOSHAN/20SF211/2020 EPI_ISL_406536      | 22/1/2020          | 36       | 37 | 36 | 37 |
| EPI_ISL_406538 | BETACOV/GUANGDONG/20SF201/2020 EPI_ISL_406538   | 23/1/2020          | 37       | 38 | 37 | 38 |
| EPI_ISL_406592 | BETACOV/SHENZHEN/SZTH-001/2020 EPI_ISL_406592   | 13/1/2020          | 38       | 39 | 38 | 39 |
| EPI_ISL_406593 | BETACOV/SHENZHEN/SZTH-002/2020 EPI_ISL_406593   | 13/1/2020          | 39       | 40 | 39 | 40 |
| EPI_ISL_406594 | BETACOV/SHENZHEN/SZTH-003/2020 EPI_ISL_406594   | 16/1/2020          | 40       | 41 | 40 | 41 |
| EPI_ISL_406595 | BETACOV/SHENZHEN/SZTH-004/2020 EPI_ISL_406595   | 16/1/2020          | 41       | 42 | 41 | 42 |

|                |                                                   |            |    |    |    |    |
|----------------|---------------------------------------------------|------------|----|----|----|----|
| EPI_ISL_406596 | BETACOV/FRANCE/IDF0372/2020 EPI_ISL_406596        | 23/1/2020  | 42 | 43 | 42 | 43 |
| EPI_ISL_406597 | BETACOV/FRANCE/IDF0373/2020 EPI_ISL_406597        | 23/1/2020  | 43 | 44 | 43 | 44 |
| EPI_ISL_406716 | BETACOV/CHINA/WHU01/2020 EPI_ISL_406716           | 2/1/2020   | 44 | 45 | 44 | 45 |
| EPI_ISL_406717 | BETACOV/CHINA/WHU02/2020 EPI_ISL_406717           | 2/1/2020   | 45 | 46 | 45 | 46 |
| EPI_ISL_406798 | BETACOV/WUHAN/WH01/2019 EPI_ISL_406798            | 26/12/2019 | 46 | 47 | 46 | 47 |
| EPI_ISL_406800 | BETACOV/WUHAN/WH03/2020 EPI_ISL_406800            | 1/1/2020   | 47 | 48 | 47 | 48 |
| EPI_ISL_406801 | BETACOV/WUHAN/WH04/2020 EPI_ISL_406801            | 5/1/2020   | 48 | 49 | 48 | 49 |
| EPI_ISL_406844 | BETACOV/AUSTRALIA/VIC01/2020 EPI_ISL_406844       | 25/1/2020  | 49 | 50 | 49 | 50 |
| EPI_ISL_406862 | BETACOV/GERMANY/BAVPAT1/2020 EPI_ISL_406862       | 28/1/2020  | 50 | 51 | 50 | 51 |
| EPI_ISL_406970 | BETACOV/HANGZHOU/HZ-1/2020 EPI_ISL_406970         | 20/1/2020  |    | 52 | 51 | 52 |
| EPI_ISL_406973 | BETACOV/SINGAPORE/1/2020 EPI_ISL_406973           | 23/1/2020  |    | 53 | 52 | 53 |
| EPI_ISL_407071 | BETACOV/ENGLAND/01/2020 EPI_ISL_407071            | 29/1/2020  |    | 54 | 53 | 54 |
| EPI_ISL_407073 | BETACOV/ENGLAND/02/2020 EPI_ISL_407073            | 29/1/2020  |    | 55 | 54 | 55 |
| EPI_ISL_407079 | BETACOV/FINLAND/1/2020 EPI_ISL_407079             | 29/1/2020  |    | 56 | 55 | 56 |
| EPI_ISL_407084 | BETACOV/JAPAN/AI/I-004/2020 EPI_ISL_407084        | 25/1/2020  |    | 57 | 56 | 57 |
| EPI_ISL_407193 | BETACOV/SOUTH_KOREA/KCDC03/2020 EPI_ISL_407193    | 25/1/2020  |    | 58 | 57 | 58 |
| EPI_ISL_407214 | BETACOV/USA/WA1-A12/2020 EPI_ISL_407214           | 25/1/2020  |    | 59 | 58 | 59 |
| EPI_ISL_407215 | BETACOV/USA/WA1-F6/2020 EPI_ISL_407215            | 25/1/2020  |    | 60 | 59 | 60 |
| EPI_ISL_407313 | BETACOV/HANGZHOU/HZCDC0001/2020 EPI_ISL_407313    | 19/1/2020  |    | 61 | 60 | 61 |
| EPI_ISL_407893 | BETACOV/AUSTRALIA/NSW01/2020 EPI_ISL_407893       | 24/1/2020  |    | 62 | 61 | 62 |
| EPI_ISL_407894 | BETACOV/AUSTRALIA/QLD01/2020 EPI_ISL_407894       | 28/1/2020  |    | 63 | 62 | 63 |
| EPI_ISL_407896 | BETACOV/AUSTRALIA/QLD02/2020 EPI_ISL_407896       | 30/1/2020  |    | 64 | 63 | 64 |
| EPI_ISL_408430 | BETACOV/FRANCE/IDF0515/2020 EPI_ISL_408430        | 29/1/2020  |    | 65 | 64 | 65 |
| EPI_ISL_408431 | BETACOV/FRANCE/IDF0626/2020 EPI_ISL_408431        | 29/1/2020  |    | 66 | 65 | 66 |
| EPI_ISL_408478 | BETACOV/CHONGQING/YC01/2020 EPI_ISL_408478        | 21/1/2020  |    | 67 | 66 | 67 |
| EPI_ISL_408479 | BETACOV/CHONGQING/ZX01/2020 EPI_ISL_408479        | 23/1/2020  |    | 68 | 67 | 68 |
| EPI_ISL_408480 | BETACOV/YUNNAN/IVDC-YN-003/2020 EPI_ISL_408480    | 17/1/2020  |    | 69 | 68 | 69 |
| EPI_ISL_408481 | BETACOV/CHONGQING/IVDC-CQ-001/2020 EPI_ISL_408481 | 18/1/2020  |    | 70 | 69 | 70 |
| EPI_ISL_408482 | BETACOV/SHANDONG/IVDC-SD-001/2020 EPI_ISL_408482  | 19/1/2020  |    | 71 | 70 | 71 |
| EPI_ISL_408484 | BETACOV/SICHUAN/IVDC-SC-001/2020 EPI_ISL_408484   | 15/1/2020  |    | 72 | 71 | 72 |
| EPI_ISL_408486 | BETACOV/JIANGXI/IVDC-JX-002/2020 EPI_ISL_408486   | 11/1/2020  |    | 73 | 72 | 73 |
| EPI_ISL_408488 | BETACOV/JIANGSU/IVDC-JS-001/2020 EPI_ISL_408488   | 19/1/2020  |    | 74 | 73 | 74 |
| EPI_ISL_408489 | BETACOV/TAIWAN/NTU01/2020 EPI_ISL_408489          | 31/1/2020  |    | 75 | 74 | 75 |
| EPI_ISL_408665 | BETACOV/JAPAN/TY-WK-012/2020 EPI_ISL_408665       | 29/1/2020  |    | 76 | 75 | 76 |
| EPI_ISL_408666 | BETACOV/JAPAN/TY-WK-501/2020 EPI_ISL_408666       | 31/1/2020  |    | 77 | 76 | 77 |
| EPI_ISL_408667 | BETACOV/JAPAN/TY-WK-521/2020 EPI_ISL_408667       | 31/1/2020  |    | 78 | 77 | 78 |
| EPI_ISL_408668 | BETACOV/VIETNAM/VR03-38142/2020 EPI_ISL_408668    | 24/1/2020  |    | 79 | 78 | 79 |
| EPI_ISL_408669 | BETACOV/JAPAN/KY-V-029/2020 EPI_ISL_408669        | 29/1/2020  |    | 80 | 79 | 80 |
| EPI_ISL_408670 | BETACOV/USA/WI1/2020 EPI_ISL_408670               | 31/1/2020  |    | 81 | 80 | 81 |
| EPI_ISL_408976 | BETACOV/SYDNEY/2/2020 EPI_ISL_408976              | 22/1/2020  |    | 82 | 81 | 82 |
| EPI_ISL_408977 | BETACOV/SYDNEY/3/2020 EPI_ISL_408977              | 25/1/2020  |    | 83 | 82 | 83 |
| EPI_ISL_409067 | BETACOV/USA/MA1/2020 EPI_ISL_409067               | 29/1/2020  |    | 84 | 83 | 84 |
| EPI_ISL_410044 | BETACOV/USA/CA6/2020 EPI_ISL_410044               | 27/1/2020  |    | 85 | 84 | 85 |
| EPI_ISL_410045 | BETACOV/USA/IL2/2020 EPI_ISL_410045               | 28/1/2020  |    | 86 | 85 | 86 |
| EPI_ISL_410218 | BETACOV/TAIWAN/NTU02/2020 EPI_ISL_410218          | 5/2/2020   |    | 87 | 86 | 87 |
| EPI_ISL_410301 | BETACOV/NEPAL/61/2020 EPI_ISL_410301              | 13/1/2020  |    | 88 | 87 | 88 |
| EPI_ISL_410486 | BETACOV/FRANCE/RA739/2020 EPI_ISL_410486          | 8/2/2020   |    | 89 | 88 | 89 |
| EPI_ISL_410531 | BETACOV/JAPAN/NA-20-05-1/2020 EPI_ISL_410531      | 25/1/2020  |    | 90 | 89 | 90 |
| EPI_ISL_410532 | BETACOV/JAPAN/OS-20-07-1/2020 EPI_ISL_410532      | 23/1/2020  |    | 91 | 90 | 91 |

|                |                                                          |            |     |     |     |
|----------------|----------------------------------------------------------|------------|-----|-----|-----|
| EPI_ISL_410535 | BETACOV/SINGAPORE/4/2020 EPI_ISL_410535                  | 3/2/2020   | 92  | 91  | 92  |
| EPI_ISL_410536 | BETACOV/SINGAPORE/5/2020 EPI_ISL_410536                  | 6/2/2020   | 93  | 92  | 93  |
| EPI_ISL_410537 | BETACOV/SINGAPORE/6/2020 EPI_ISL_410537                  | 9/2/2020   | 94  | 93  | 94  |
| EPI_ISL_410545 | BETACOV/ITALY/INMI1-ISL/2020 EPI_ISL_410545              | 29/1/2020  | 95  | 94  | 95  |
| EPI_ISL_410546 | BETACOV/ITALY/INMI1-CS/2020 EPI_ISL_410546               | 31/1/2020  | 96  | 95  | 96  |
| EPI_ISL_410713 | BETACOV/SINGAPORE/7/2020 EPI_ISL_410713                  | 27/1/2020  | 97  | 96  | 97  |
| EPI_ISL_410714 | BETACOV/SINGAPORE/8/2020 EPI_ISL_410714                  | 3/2/2020   | 98  | 97  | 98  |
| EPI_ISL_410715 | BETACOV/SINGAPORE/9/2020 EPI_ISL_410715                  | 4/2/2020   | 99  | 98  | 99  |
| EPI_ISL_410716 | BETACOV/SINGAPORE/10/2020 EPI_ISL_410716                 | 4/2/2020   | 100 | 99  | 100 |
| EPI_ISL_410717 | BETACOV/AUSTRALIA/QLD03/2020 EPI_ISL_410717              | 5/2/2020   | 101 | 100 | 101 |
| EPI_ISL_410718 | BETACOV/AUSTRALIA/QLD04/2020 EPI_ISL_410718              | 5/2/2020   | 102 | 101 | 102 |
| EPI_ISL_410719 | BETACOV/SINGAPORE/11/2020 EPI_ISL_410719                 | 2/2/2020   | 103 | 102 | 103 |
| EPI_ISL_410720 | BETACOV/FRANCE/IDF0372-ISL/2020 EPI_ISL_410720           | 23/1/2020  | 104 | 103 | 104 |
| EPI_ISL_410984 | BETACOV/FRANCE/IDF0515-ISL/2020 EPI_ISL_410984           | 29/1/2020  | 105 | 104 | 105 |
| EPI_ISL_411060 | BETACOV/FUJIAN/8/2020 EPI_ISL_411060                     | 21/1/2020  | 106 | 105 | 106 |
| EPI_ISL_411066 | BETACOV/FUJIAN/13/2020 EPI_ISL_411066                    | 22/1/2020  | 107 | 106 | 107 |
| EPI_ISL_411218 | BETACOV/FRANCE/IDF0571/2020 EPI_ISL_411218               | 2/2/2020   | 108 | 107 | 108 |
| EPI_ISL_411219 | BETACOV/FRANCE/IDF0386-ISLP1/2020 EPI_ISL_411219         | 28/1/2020  | 109 | 108 | 109 |
| EPI_ISL_411220 | BETACOV/FRANCE/IDF0386-ISLP3/2020 EPI_ISL_411220         | 28/1/2020  | 110 | 109 | 110 |
| EPI_ISL_411902 | BETACOV/CAMBODIA/0012/2020 EPI_ISL_411902                | 27/1/2020  | 111 | 110 | 111 |
| EPI_ISL_411915 | BETACOV/TAIWAN/CGMH-CGU-01/2020 EPI_ISL_411915           | 25/1/2020  | 112 | 111 | 112 |
| EPI_ISL_411926 | BETACOV/TAIWAN/3/2020 EPI_ISL_411926                     | 24/1/2020  | 113 | 112 | 113 |
| EPI_ISL_411927 | BETACOV/TAIWAN/4/2020 EPI_ISL_411927                     | 28/1/2020  | 114 | 113 | 114 |
| EPI_ISL_411929 | BETACOV/SOUTH_KOREA/SNU01/2020 EPI_ISL_411929            | 1/1/2020   | 115 | 114 | 115 |
| EPI_ISL_411950 | BETACOV/JIANGSU/JS01/2020 EPI_ISL_411950                 | 23/1/2020  | 116 | 115 | 116 |
| EPI_ISL_411951 | BETACOV/SWEDEN/01/2020 EPI_ISL_411951                    | 7/2/2020   | 117 | 116 | 117 |
| EPI_ISL_411952 | BETACOV/JIANGSU/JS02/2020 EPI_ISL_411952                 | 24/1/2020  | 118 | 117 | 118 |
| EPI_ISL_411953 | BETACOV/JIANGSU/JS03/2020 EPI_ISL_411953                 | 24/1/2020  | 119 | 118 | 119 |
| EPI_ISL_411954 | BETACOV/USA/CA7/2020 EPI_ISL_411954                      | 6/2/2020   | 120 | 119 | 120 |
| EPI_ISL_411955 | BETACOV/USA/CA8/2020 EPI_ISL_411955                      | 10/2/2020  | 121 | 120 | 121 |
| EPI_ISL_411956 | BETACOV/USA/TX1/2020 EPI_ISL_411956                      | 11/2/2020  | 122 | 121 | 122 |
| EPI_ISL_411957 | BETACOV/CHINA/WH-09/2020 EPI_ISL_411957                  | 8/1/2020   | 123 | 122 | 123 |
| EPI_ISL_412026 | BETACOV/HEFEI/2/2020 EPI_ISL_412026                      | 23/2/2020  | 124 | 123 | 124 |
| EPI_ISL_412028 | BETACOV/HONG_KONG/VM20001061/2020 EPI_ISL_412028         | 22/1/2020  | 125 | 124 | 125 |
| EPI_ISL_412029 | BETACOV/HONG_KONG/VM20001988/2020 EPI_ISL_412029         | 30/1/2020  | 126 | 125 | 126 |
| EPI_ISL_412030 | BETACOV/HONG_KONG/VB20026565/2020 EPI_ISL_412030         | 1/2/2020   | 127 | 126 | 127 |
| EPI_ISL_412116 | BETACOV/ENGLAND/09C/2020 EPI_ISL_412116                  | 9/2/2020   | 128 | 127 | 128 |
| EPI_ISL_412459 | BETACOV/JINGZHOU/HBCDC-HB-01/2020 EPI_ISL_412459         | 8/1/2020   | 129 | 128 | 129 |
| EPI_ISL_412862 | BETACOV/USA/CA9/2020 EPI_ISL_412862                      | 23/2/2020  | 130 | 129 | 130 |
| EPI_ISL_412869 | BETACOV/KOREA/KCDC05/2020 EPI_ISL_412869                 | 30/1/2020  | 131 | 130 | 131 |
| EPI_ISL_412870 | BETACOV/KOREA/KCDC06/2020 EPI_ISL_412870                 | 30/1/2020  | 132 | 131 | 132 |
| EPI_ISL_412871 | BETACOV/KOREA/KCDC07/2020 EPI_ISL_412871                 | 31/1/2020  | 133 | 132 | 133 |
| EPI_ISL_412872 | BETACOV/KOREA/KCDC12/2020 EPI_ISL_412872                 | 1/2/2020   | 134 | 133 | 134 |
| EPI_ISL_412873 | BETACOV/KOREA/KCDC24/2020 EPI_ISL_412873                 | 6/2/2020   | 135 | 134 | 135 |
| EPI_ISL_412898 | BETACOV/WUHAN/HBCDC-HB-02/2019 EPI_ISL_412898            | 30/12/2019 | 136 | 135 | 136 |
| EPI_ISL_412899 | BETACOV/WUHAN/HBCDC-HB-03/2019 EPI_ISL_412899            | 30/12/2019 | 137 | 136 | 137 |
| EPI_ISL_412912 | BETACOV/GERMANY/BADEN-WUERTTEMBERG-1/2020 EPI_ISL_412912 | 25/2/2020  | 138 | 137 | 138 |
| EPI_ISL_412966 | BETACOV/CHINA/IQTC01/2020 EPI_ISL_412966                 | 5/2/2020   | 139 | 138 | 139 |
| EPI_ISL_412967 | BETACOV/CHINA/IQTC02/2020 EPI_ISL_412967                 | 29/1/2020  | 140 | 139 | 140 |

|                |                                                    |           |     |     |     |
|----------------|----------------------------------------------------|-----------|-----|-----|-----|
| EPI_ISL_412968 | BETACOV/JAPAN/HU_DP_KNG_19-020/2020 EPI_ISL_412968 | 10/2/2020 | 141 | 140 | 141 |
| EPI_ISL_412969 | BETACOV/JAPAN/HU_DP_KNG_19-027/2020 EPI_ISL_412969 | 10/2/2020 | 142 | 141 | 142 |
| EPI_ISL_412970 | BETACOV/USA/WA2/2020 EPI_ISL_412970                | 24/2/2020 | 143 | 142 | 143 |
| EPI_ISL_412972 | BETACOV/MEXICO/CDMX/INDRE_01/2020 EPI_ISL_412972   | 27/2/2020 | 144 | 143 | 144 |
| EPI_ISL_412973 | BETACOV/ITALY/CDG1/2020 EPI_ISL_412973             | 20/2/2020 | 145 | 144 | 145 |
| EPI_ISL_412974 | BETACOV/ITALY/SPL1/2020_ EPI_ISL_412974            | 29/1/2020 | 146 | 145 | 146 |
| EPI_ISL_412975 | BETACOV/AUSTRALIA/NSW05/2020 EPI_ISL_412975        | 28/2/2020 | 147 | 146 | 147 |
| EPI_ISL_412978 | BETACOV/WUHAN/HBCDC-HB-02/2020 EPI_ISL_412978      | 17/1/2020 | 148 | 147 | 148 |
| EPI_ISL_412979 | BETACOV/WUHAN/HBCDC-HB-03/2020 EPI_ISL_412979      | 18/1/2020 | 149 | 148 | 149 |
| EPI_ISL_412980 | BETACOV/WUHAN/HBCDC-HB-04/2020 EPI_ISL_412980      | 18/1/2020 | 150 | 149 | 150 |
| EPI_ISL_412981 | BETACOV/WUHAN/HBCDC-HB-05/2020 EPI_ISL_412981      | 18/1/2020 | 151 | 150 | 151 |
| EPI_ISL_412982 | BETACOV/WUHAN/HBCDC-HB-06/2020 EPI_ISL_412982      | 7/2/2020  | 152 | 151 | 152 |
| EPI_ISL_412983 | BETACOV/TIANMEN/HBCDC-HB-07/2020 EPI_ISL_412983    | 8/2/2020  | 153 | 152 | 153 |
| EPI_ISL_413014 | BETACOV/CANADA/ON-PHL2445/2020 EPI_ISL_413014      | 25/1/2020 | 154 | 153 | 154 |
| EPI_ISL_413015 | BETACOV/CANADA/ON-VIDO-01/2020 EPI_ISL_413015      | 23/1/2020 | 155 | 154 | 155 |
| EPI_ISL_413016 | BETACOV/BRAZIL/SPBR-02/2020 EPI_ISL_413016         | 28/2/2020 | 156 | 155 | 156 |
| EPI_ISL_413017 | BETACOV/SOUTH_KOREA/KUMC01/2020 EPI_ISL_413017     | 6/2/2020  | 157 | 156 | 157 |
| EPI_ISL_413018 | BETACOV/SOUTH_KOREA/KUMC02/2020 EPI_ISL_413018     | 6/2/2020  | 158 | 157 | 158 |
| EPI_ISL_413021 | BETACOV/SWITZERLAND/1000477757/2020 EPI_ISL_413021 | 29/2/2020 | 159 | 158 | 159 |
| EPI_ISL_413022 | BETACOV/SWITZERLAND/1000477796/2020 EPI_ISL_413022 | 29/2/2020 | 160 | 159 | 160 |
| EPI_ISL_413023 | BETACOV/SWITZERLAND/1000477797/2020 EPI_ISL_413023 | 29/2/2020 | 161 | 160 | 161 |
| EPI_ISL_413024 | BETACOV/SWITZERLAND/1000477806/2020 EPI_ISL_413024 | 29/2/2020 | 162 | 161 | 162 |
| EPI_ISL_413025 | BETACOV/USA/WA3-UW1/2020 EPI_ISL_413025            | 27/2/2020 | 163 | 162 | 163 |
| EPI_ISL_413213 | BETACOV/AUSTRALIA/NSW06/2020 EPI_ISL_413213        | 29/2/2020 | 164 | 163 | 164 |
| EPI_ISL_413214 | BETACOV/AUSTRALIA/NSW07/2020 EPI_ISL_413214        | 29/2/2020 | 165 | 164 | 165 |
| EPI_ISL_413455 | BETACOV/USA/WA4-UW2/2020 EPI_ISL_413455            | 28/2/2020 | 166 | 165 | 166 |
| EPI_ISL_413456 | BETACOV/USA/WA-S2/2020 EPI_ISL_413456              | 20/2/2020 | 167 | 166 | 167 |
| EPI_ISL_413457 | BETACOV/USA/WA6-UW3/2020 EPI_ISL_413457            | 29/2/2020 | 168 | 167 | 168 |
| EPI_ISL_413458 | BETACOV/USA/WA7-UW4/2020 EPI_ISL_413458            | 1/3/2020  | 169 | 168 | 169 |
| EPI_ISL_413459 | BETACOV/JAPAN/TK/20-31-3/2020 EPI_ISL_413459       | 20/2/2020 | 170 | 169 | 170 |
| EPI_ISL_413485 | BETACOV/ANHUI/SZ005/2020 EPI_ISL_413485            | 24/1/2020 | 171 | 170 | 171 |
| EPI_ISL_413489 | HCOV-19/ITALY/UNISR1/2020 EPI_ISL_413489           | 3/3/2020  |     | 171 | 172 |
| EPI_ISL_413513 | HCOV-19/SOUTH_KOREA/KUMC03/2020 EPI_ISL_413513     | 27/2/2020 |     | 172 | 173 |
| EPI_ISL_413514 | HCOV-19/SOUTH_KOREA/KUMC04/2020 EPI_ISL_413514     | 27/2/2020 |     | 173 | 174 |
| EPI_ISL_413515 | HCOV-19/SOUTH_KOREA/KUMC05/2020 EPI_ISL_413515     | 27/2/2020 |     | 174 | 175 |
| EPI_ISL_413516 | HCOV-19/SOUTH_KOREA/KUMC06/2020 EPI_ISL_413516     | 27/2/2020 |     | 175 | 176 |
| EPI_ISL_413518 | HCOV-19/BEIJING/105/2020 EPI_ISL_413518            | 26/1/2020 |     | 176 | 177 |
| EPI_ISL_413519 | HCOV-19/BEIJING/231/2020 EPI_ISL_413519            | 28/1/2020 |     | 177 | 178 |
| EPI_ISL_413520 | HCOV-19/BEIJING/233/2020 EPI_ISL_413520            | 28/1/2020 |     | 178 | 179 |
| EPI_ISL_413521 | HCOV-19/BEIJING/235/2020 EPI_ISL_413521            | 28/1/2020 |     | 179 | 180 |
| EPI_ISL_413522 | HCOV-19/INDIA/1-27/2020 EPI_ISL_413522             | 27/1/2020 |     | 180 | 181 |
| EPI_ISL_413523 | HCOV-19/INDIA/1-31/2020 EPI_ISL_413523             | 31/1/2020 |     | 181 | 182 |
| EPI_ISL_413555 | HCOV-19/WALES/PHW1/2020 EPI_ISL_413555             | 27/2/2020 |     | 182 | 183 |
| EPI_ISL_413556 | HCOV-19/WALES/PHW2/2020 EPI_ISL_413556             | 4/3/2020  |     | -   | 184 |
| EPI_ISL_413557 | HCOV-19/USA/CA-CDPH-UC1/2020 EPI_ISL_413557        | 7/3/2020  |     | 183 | 185 |
| EPI_ISL_413558 | HCOV-19/USA/CA-CDPH-UC2/2020 EPI_ISL_413558        | 27/2/2020 |     | 184 | 186 |
| EPI_ISL_413559 | HCOV-19/USA/CA-CDPH-UC3/2020 EPI_ISL_413559        | 27/2/2020 |     | 185 | 187 |
| EPI_ISL_413560 | HCOV-19/USA/WA-S3/2020 EPI_ISL_413560              | 28/2/2020 |     | 186 | 188 |
| EPI_ISL_413563 | HCOV-19/USA/WA12-UW8/2020 EPI_ISL_413563           | 3/3/2020  |     | 187 | 189 |

|                |                                                                        |           |  |  |     |     |
|----------------|------------------------------------------------------------------------|-----------|--|--|-----|-----|
| EPI_ISL_413566 | HCOV-19/NETHERLANDS/BLARICUM_1364780/2020 EPI_ISL_413566               | 2/3/2020  |  |  | 188 | 190 |
| EPI_ISL_413572 | HCOV-19/NETHERLANDS/HAARLEM_1363688/2020 EPI_ISL_413572                | 1/3/2020  |  |  | 189 | 191 |
| EPI_ISL_413573 | HCOV-19/NETHERLANDS/HARDINXVELD_GIESSENDAM_1364806/2020 EPI_ISL_413573 | 2/3/2020  |  |  | 190 | 192 |
| EPI_ISL_413577 | HCOV-19/NETHERLANDS/NAARDEN_1364774/2020 EPI_ISL_413577                | 2/3/2020  |  |  | 191 | 193 |
| EPI_ISL_413579 | HCOV-19/NETHERLANDS/NOOTDORP_1364222/2020 EPI_ISL_413579               | 3/3/2020  |  |  | 192 | 194 |
| EPI_ISL_413580 | HCOV-19/NETHERLANDS/OISTERWIJK_1364072/2020 EPI_ISL_413580             | 2/3/2020  |  |  | 193 | 195 |
| EPI_ISL_413581 | HCOV-19/NETHERLANDS/OSS_1363500/2020 EPI_ISL_413581                    | 29/2/2020 |  |  | 194 | 196 |
| EPI_ISL_413582 | HCOV-19/NETHERLANDS/ROTTERDAM_1363790/2020 EPI_ISL_413582              | 1/3/2020  |  |  | 195 | 197 |
| EPI_ISL_413583 | HCOV-19/NETHERLANDS/ROTTERDAM_1364040/2020 EPI_ISL_413583              | 2/3/2020  |  |  | 196 | 198 |
| EPI_ISL_413584 | HCOV-19/NETHERLANDS/ROTTERDAM_1364740/2020 EPI_ISL_413584              | 3/3/2020  |  |  | 197 | 199 |
| EPI_ISL_413587 | HCOV-19/NETHERLANDS/TILBURG_1364286/2020 EPI_ISL_413587                | 3/3/2020  |  |  | 198 | 200 |
| EPI_ISL_413589 | HCOV-19/NETHERLANDS/UTRECHT_1363628/2020 EPI_ISL_413589                | 1/3/2020  |  |  | 199 | 201 |
| EPI_ISL_413590 | HCOV-19/NETHERLANDS/UTRECHT_1364066/2020 EPI_ISL_413590                | 2/3/2020  |  |  | 200 | 202 |
| EPI_ISL_413591 | HCOV-19/NETHERLANDS/ZEEWOLDE_1365080/2020 EPI_ISL_413591               | 2/3/2020  |  |  | 201 | 203 |
| EPI_ISL_413592 | HCOV-19/TAIWAN/NTU03/2020 EPI_ISL_413592                               | 2/3/2020  |  |  | 202 | 204 |
| EPI_ISL_413593 | HCOV-19/LUXEMBURG/LUX1/2020 EPI_ISL_413593                             | 29/2/2020 |  |  | 203 | 205 |
| EPI_ISL_413594 | HCOV-19/AUSTRALIA/NSW08/2020 EPI_ISL_413594                            | 28/2/2020 |  |  | 204 | 206 |
| EPI_ISL_413595 | HCOV-19/AUSTRALIA/NSW09/2020 EPI_ISL_413595                            | 28/2/2020 |  |  | 205 | 207 |
| EPI_ISL_413596 | HCOV-19/AUSTRALIA/NSW10/2020 EPI_ISL_413596                            | 28/2/2020 |  |  | 206 | 208 |
| EPI_ISL_413597 | HCOV-19/AUSTRALIA/NSW11/2020 EPI_ISL_413597                            | 2/3/2020  |  |  | 207 | 209 |
| EPI_ISL_413598 | HCOV-19/AUSTRALIA/NSW12/2020 EPI_ISL_413598                            | 4/3/2020  |  |  | 208 | 210 |
| EPI_ISL_413599 | HCOV-19/AUSTRALIA/NSW13/2020 EPI_ISL_413599                            | 4/3/2020  |  |  | 209 | 211 |
| EPI_ISL_413600 | HCOV-19/AUSTRALIA/NSW14/2020 EPI_ISL_413600                            | 3/3/2020  |  |  | 210 | 212 |
| EPI_ISL_413602 | HCOV-19/FINLAND/FIN03032020A/2020 EPI_ISL_413602                       | 3/3/2020  |  |  | 211 | 213 |
| EPI_ISL_413603 | HCOV-19/FINLAND/FIN03032020B/2020 EPI_ISL_413603                       | 3/3/2020  |  |  | 212 | 214 |
| EPI_ISL_413604 | HCOV-19/FINLAND/FIN03032020C/2020 EPI_ISL_413604                       | 3/3/2020  |  |  | 213 | 215 |
| EPI_ISL_413924 | HCOV-19/USA/CA-CDPH-UC6/2020 EPI_ISL_413924                            | 5/3/2020  |  |  |     | 216 |
| EPI_ISL_413925 | HCOV-19/USA/CA-CDPH-UC7/2020 EPI_ISL_413925                            | 5/3/2020  |  |  |     | 217 |
| EPI_ISL_413928 | HCOV-19/USA/CA-CDPH-UC9/2020 EPI_ISL_413928                            | 5/3/2020  |  |  |     | 218 |
| EPI_ISL_413931 | HCOV-19/USA/UC-CDPH-UC11/2020 EPI_ISL_413931                           | 5/3/2020  |  |  |     | 219 |
| EPI_ISL_414017 | HCOV-19/BRAZIL/SPBR-04/2020 EPI_ISL_414017                             | 4/3/2020  |  |  |     | 220 |
| EPI_ISL_414027 | HCOV-19/SCOTLAND/CVR05/2020 EPI_ISL_414027                             | 4/3/2020  |  |  |     | 221 |
| EPI_ISL_414045 | HCOV-19/BRAZIL-RJ/314/2020 EPI_ISL_414045                              | 4/3/2020  |  |  |     | 222 |
| EPI_ISL_414363 | HCOV-19/USA/WA-UW15/2020 EPI_ISL_414363                                | 4/3/2020  |  |  |     | 223 |
| EPI_ISL_414366 | HCOV-19/USA/WA-UW18/2020 EPI_ISL_414366                                | 5/3/2020  |  |  |     | 224 |
| EPI_ISL_414367 | HCOV-19/USA/WA-UW19/2020 EPI_ISL_414367                                | 5/3/2020  |  |  |     | 225 |
| EPI_ISL_414368 | HCOV-19/USA/WA-UW20/2020 EPI_ISL_414368                                | 5/3/2020  |  |  |     | 226 |
| EPI_ISL_414369 | HCOV-19/USA/WA-UW21/2020 EPI_ISL_414369                                | 5/3/2020  |  |  |     | 227 |
| EPI_ISL_414424 | HCOV-19/NETHERLANDS/LIMBURG_2/2020 EPI_ISL_414424                      | 3/3/2020  |  |  |     | 228 |
| EPI_ISL_414425 | HCOV-19/NETHERLANDS/LIMBURG_3/2020 EPI_ISL_414425                      | 3/3/2020  |  |  |     | 229 |
| EPI_ISL_414426 | HCOV-19/NETHERLANDS/LIMBURG_4/2020 EPI_ISL_414426                      | 3/3/2020  |  |  |     | 230 |
| EPI_ISL_414430 | HCOV-19/NETHERLANDS/NOORDBRABANT_5/2020 EPI_ISL_414430                 | 5/3/2020  |  |  |     | 231 |
| EPI_ISL_414433 | HCOV-19/NETHERLANDS/NOORDHOLLAND_1/2020 EPI_ISL_414433                 | 3/3/2020  |  |  |     | 232 |
| EPI_ISL_414434 | HCOV-19/NETHERLANDS/OVERIJSSSEL_1/2020 EPI_ISL_414434                  | 3/3/2020  |  |  |     | 233 |
| EPI_ISL_414435 | HCOV-19/NETHERLANDS/UTRECHT_1/2020 EPI_ISL_414435                      | 3/3/2020  |  |  |     | 234 |
| EPI_ISL_414436 | HCOV-19/NETHERLANDS/UTRECHT_2/2020 EPI_ISL_414436                      | 3/3/2020  |  |  |     | 235 |
| EPI_ISL_414437 | HCOV-19/NETHERLANDS/UTRECHT_3/2020 EPI_ISL_414437                      | 3/3/2020  |  |  |     | 236 |
| EPI_ISL_414438 | HCOV-19/NETHERLANDS/UTRECHT_4/2020 EPI_ISL_414438                      | 3/3/2020  |  |  |     | 237 |
| EPI_ISL_414440 | HCOV-19/NETHERLANDS/UTRECHT_7/2020 EPI_ISL_414440                      | 3/3/2020  |  |  |     | 238 |

|                |                                                         |          |  |  |  |     |
|----------------|---------------------------------------------------------|----------|--|--|--|-----|
| EPI_ISL_414441 | HCOV-19/NETHERLANDS/UTRECHT_8/2020 EPI_ISL_414441       | 3/3/2020 |  |  |  | 239 |
| EPI_ISL_414442 | HCOV-19/NETHERLANDS/UTRECHT_10/2020 EPI_ISL_414442      | 3/3/2020 |  |  |  | 240 |
| EPI_ISL_414443 | HCOV-19/NETHERLANDS/UTRECHT_11/2020 EPI_ISL_414443      | 3/3/2020 |  |  |  | 241 |
| EPI_ISL_414445 | HCOV-19/NETHERLANDS/ZUIDHOLLAND_9/2020 EPI_ISL_414445   | 3/3/2020 |  |  |  | 242 |
| EPI_ISL_414446 | HCOV-19/NETHERLANDS/ZUIDHOLLAND_10/2020 EPI_ISL_414446  | 3/3/2020 |  |  |  | 243 |
| EPI_ISL_414448 | HCOV-19/NETHERLANDS/LIMBURG_5/2020 EPI_ISL_414448       | 4/3/2020 |  |  |  | 244 |
| EPI_ISL_414449 | HCOV-19/NETHERLANDS/NOORDBRABANT_2/2020 EPI_ISL_414449  | 3/3/2020 |  |  |  | 245 |
| EPI_ISL_414451 | HCOV-19/NETHERLANDS/NOORDBRABANT_6/2020 EPI_ISL_414451  | 6/3/2020 |  |  |  | 246 |
| EPI_ISL_414454 | HCOV-19/NETHERLANDS/NOORDBRABANT_14/2020 EPI_ISL_414454 | 5/3/2020 |  |  |  | 247 |
| EPI_ISL_414457 | HCOV-19/NETHERLANDS/NOORDBRABANT_17/2020 EPI_ISL_414457 | 6/3/2020 |  |  |  | 248 |
| EPI_ISL_414460 | HCOV-19/NETHERLANDS/OVERIJSSSEL_2/2020 EPI_ISL_414460   | 3/3/2020 |  |  |  | 249 |
| EPI_ISL_414461 | HCOV-19/NETHERLANDS/UTRECHT_6/2020 EPI_ISL_414461       | 4/3/2020 |  |  |  | 250 |
| EPI_ISL_414463 | HCOV-19/NETHERLANDS/UTRECHT_13/2020 EPI_ISL_414463      | 4/3/2020 |  |  |  | 251 |
| EPI_ISL_414464 | HCOV-19/NETHERLANDS/UTRECHT_14/2020 EPI_ISL_414464      | 4/3/2020 |  |  |  | 252 |
| EPI_ISL_414468 | HCOV-19/NETHERLANDS/ZUIDHOLLAND_8/2020 EPI_ISL_414468   | 6/3/2020 |  |  |  | 253 |
| EPI_ISL_414469 | HCOV-19/NETHERLANDS/ZUIDHOLLAND_11/2020 EPI_ISL_414469  | 4/3/2020 |  |  |  | 254 |
| EPI_ISL_414470 | HCOV-19/NETHERLANDS/ZUIDHOLLAND_13/2020 EPI_ISL_414470  | 6/3/2020 |  |  |  | 255 |
| EPI_ISL_414471 | HCOV-19/NETHERLANDS/ZUIDHOLLAND_14/2020 EPI_ISL_414471  | 5/3/2020 |  |  |  | 256 |
| EPI_ISL_414487 | HCOV-19/IRELAND/COR-20134/2020 EPI_ISL_414487           | 4/3/2020 |  |  |  | 257 |
| EPI_ISL_414500 | HCOV-19/ENGLAND/SHEFF01/2020 EPI_ISL_414500             | 4/3/2020 |  |  |  | 258 |
| EPI_ISL_414501 | HCOV-19/ENGLAND/SHEFF02/2020 EPI_ISL_414501             | 3/3/2020 |  |  |  | 259 |
| EPI_ISL_414526 | HCOV-19/ENGLAND/201040141/2020 EPI_ISL_414526           | 3/3/2020 |  |  |  | 260 |
| EPI_ISL_414529 | HCOV-19/NETHERLANDS/NOORDBRABANT_20/2020 EPI_ISL_414529 | 4/3/2020 |  |  |  | 261 |
| EPI_ISL_414530 | HCOV-19/NETHERLANDS/NOORDBRABANT_21/2020 EPI_ISL_414530 | 4/3/2020 |  |  |  | 262 |
| EPI_ISL_414531 | HCOV-19/NETHERLANDS/NOORDBRABANT_22/2020 EPI_ISL_414531 | 4/3/2020 |  |  |  | 263 |
| EPI_ISL_414532 | HCOV-19/NETHERLANDS/NOORDBRABANT_23/2020 EPI_ISL_414532 | 5/3/2020 |  |  |  | 264 |
| EPI_ISL_414534 | HCOV-19/NETHERLANDS/NOORDBRABANT_25/2020 EPI_ISL_414534 | 6/3/2020 |  |  |  | 265 |
| EPI_ISL_414535 | HCOV-19/NETHERLANDS/NOORDBRABANT_26/2020 EPI_ISL_414535 | 6/3/2020 |  |  |  | 266 |
| EPI_ISL_414545 | HCOV-19/NETHERLANDS/NOORDBRABANT_36/2020 EPI_ISL_414545 | 3/3/2020 |  |  |  | 267 |
| EPI_ISL_414546 | HCOV-19/NETHERLANDS/NOORDBRABANT_37/2020 EPI_ISL_414546 | 6/3/2020 |  |  |  | 268 |
| EPI_ISL_414547 | HCOV-19/NETHERLANDS/NOORDBRABANT_38/2020 EPI_ISL_414547 | 6/3/2020 |  |  |  | 269 |
| EPI_ISL_414548 | HCOV-19/NETHERLANDS/NOORDBRABANT_39/2020 EPI_ISL_414548 | 4/3/2020 |  |  |  | 270 |
| EPI_ISL_414549 | HCOV-19/NETHERLANDS/NOORDHOLLAND_2/2020 EPI_ISL_414549  | 3/3/2020 |  |  |  | 271 |
| EPI_ISL_414552 | HCOV-19/NETHERLANDS/UTRECHT_13/2020 EPI_ISL_414552      | 7/3/2020 |  |  |  | 272 |
| EPI_ISL_414554 | HCOV-19/NETHERLANDS/UTRECHT_15/2020 EPI_ISL_414554      | 8/3/2020 |  |  |  | 273 |
| EPI_ISL_414555 | HCOV-19/NETHERLANDS/UTRECHT_16/2020 EPI_ISL_414555      | 8/3/2020 |  |  |  | 274 |
| EPI_ISL_414556 | HCOV-19/NETHERLANDS/ZUIDHOLLAND_2/2020 EPI_ISL_414556   | 6/3/2020 |  |  |  | 275 |
| EPI_ISL_414557 | HCOV-19/NETHERLANDS/ZUIDHOLLAND_15/2020 EPI_ISL_414557  | 8/3/2020 |  |  |  | 276 |
| EPI_ISL_414558 | HCOV-19/NETHERLANDS/ZUIDHOLLAND_16/2020 EPI_ISL_414558  | 6/3/2020 |  |  |  | 277 |
| EPI_ISL_414559 | HCOV-19/NETHERLANDS/ZUIDHOLLAND_17/2020 EPI_ISL_414559  | 7/3/2020 |  |  |  | 278 |
| EPI_ISL_414560 | HCOV-19/NETHERLANDS/ZUIDHOLLAND_18/2020 EPI_ISL_414560  | 3/3/2020 |  |  |  | 279 |
| EPI_ISL_414561 | HCOV-19/NETHERLANDS/ZUIDHOLLAND_19/2020 EPI_ISL_414561  | 5/3/2020 |  |  |  | 280 |
| EPI_ISL_414562 | HCOV-19/NETHERLANDS/ZUIDHOLLAND_20/2020 EPI_ISL_414562  | 3/3/2020 |  |  |  | 281 |
| EPI_ISL_414564 | HCOV-19/NETHERLANDS/ZUIDHOLLAND_22/2020 EPI_ISL_414564  | 8/3/2020 |  |  |  | 282 |
| EPI_ISL_414565 | HCOV-19/NETHERLANDS/ZUIDHOLLAND_23/2020 EPI_ISL_414565  | 9/3/2020 |  |  |  | 283 |
| EPI_ISL_414566 | HCOV-19/NETHERLANDS/ZUIDHOLLAND_24/2020 EPI_ISL_414566  | 6/3/2020 |  |  |  | 284 |
| EPI_ISL_414578 | HCOV-19/CHILE/TALCA-2/2020 EPI_ISL_414578               | 4/3/2020 |  |  |  | 285 |
| EPI_ISL_414579 | HCOV-19/CHILE/SANTIAGO-1/2020 EPI_ISL_414579            | 3/3/2020 |  |  |  | 286 |
| EPI_ISL_414580 | HCOV-19/CHILE/SANTIAGO-2/2020 EPI_ISL_414580            | 5/3/2020 |  |  |  | 287 |

|                |                                                      |           |  |  |  |     |
|----------------|------------------------------------------------------|-----------|--|--|--|-----|
| EPI_ISL_414586 | HCOV-19/IRELAND/LIMERICK-19934/2020 EPI_ISL_414586   | 3/3/2020  |  |  |  | 288 |
| EPI_ISL_414587 | HCOV-19/IRELAND/LIMERICK-19935/2020 EPI_ISL_414587   | 3/3/2020  |  |  |  | 289 |
| EPI_ISL_414589 | HCOV-19/USA/MN2-MDH2/2020 EPI_ISL_414589             | 7/3/2020  |  |  |  | 290 |
| EPI_ISL_414590 | HCOV-19/USA/MN3-MDH3/2020 EPI_ISL_414590             | 9/3/2020  |  |  |  | 291 |
| EPI_ISL_414591 | HCOV-19/USA/WA-UW22/2020 EPI_ISL_414591              | 6/3/2020  |  |  |  | 292 |
| EPI_ISL_414592 | HCOV-19/USA/WA-UW23/2020 EPI_ISL_414592              | 6/3/2020  |  |  |  | 293 |
| EPI_ISL_414593 | HCOV-19/USA/WA-UW24/2020 EPI_ISL_414593              | 5/3/2020  |  |  |  | 294 |
| EPI_ISL_414594 | HCOV-19/USA/WA-UW25/2020 EPI_ISL_414594              | 5/3/2020  |  |  |  | 295 |
| EPI_ISL_414595 | HCOV-19/USA/WA-UW26/2020 EPI_ISL_414595              | 5/3/2020  |  |  |  | 296 |
| EPI_ISL_414596 | HCOV-19/USA/WA-UW27/2020 EPI_ISL_414596              | 4/3/2020  |  |  |  | 297 |
| EPI_ISL_414597 | HCOV-19/USA/WA-UW28/2020 EPI_ISL_414597              | 4/3/2020  |  |  |  | 298 |
| EPI_ISL_414616 | HCOV-19/USA/WA-UW29/2020 EPI_ISL_414616              | 8/3/2020  |  |  |  | 299 |
| EPI_ISL_414617 | HCOV-19/USA/WA-UW30/2020 EPI_ISL_414617              | 8/3/2020  |  |  |  | 300 |
| EPI_ISL_414618 | HCOV-19/USA/WA-UW31/2020 EPI_ISL_414618              | 8/3/2020  |  |  |  | 301 |
| EPI_ISL_414619 | HCOV-19/USA/WA-UW32/2020 EPI_ISL_414619              | 7/3/2020  |  |  |  | 302 |
| EPI_ISL_414620 | HCOV-19/USA/WA-UW33/2020 EPI_ISL_414620              | 8/3/2020  |  |  |  | 303 |
| EPI_ISL_414621 | HCOV-19/USA/WA-UW34/2020 EPI_ISL_414621              | 8/3/2020  |  |  |  | 304 |
| EPI_ISL_414622 | HCOV-19/USA/WA-UW35/2020 EPI_ISL_414622              | 8/3/2020  |  |  |  | 305 |
| EPI_ISL_414629 | HCOV-19/FRANCE/HF1870/2020 EPI_ISL_414629            | 3/3/2020  |  |  |  | 306 |
| EPI_ISL_414630 | HCOV-19/FRANCE/HF1871/2020 EPI_ISL_414630            | 3/3/2020  |  |  |  | 307 |
| EPI_ISL_414631 | HCOV-19/FRANCE/GE1973/2020 EPI_ISL_414631            | 4/3/2020  |  |  |  | 308 |
| EPI_ISL_414632 | HCOV-19/FRANCE/GE1977/2020 EPI_ISL_414632            | 4/3/2020  |  |  |  | 309 |
| EPI_ISL_414633 | HCOV-19/FRANCE/IDF1980/2020 EPI_ISL_414633           | 4/3/2020  |  |  |  | 310 |
| EPI_ISL_414635 | HCOV-19/FRANCE/HF1988/2020 EPI_ISL_414635            | 4/3/2020  |  |  |  | 311 |
| EPI_ISL_414637 | HCOV-19/FRANCE/HF1993/2020 EPI_ISL_414637            | 4/3/2020  |  |  |  | 312 |
| EPI_ISL_414638 | HCOV-19/FRANCE/HF1995/2020 EPI_ISL_414638            | 4/3/2020  |  |  |  | 313 |
| EPI_ISL_414641 | HCOV-19/FINLAND/FIN-313/2020 EPI_ISL_414641          | 5/3/2020  |  |  |  | 314 |
| EPI_ISL_414642 | HCOV-19/FINLAND/FIN-455/2020 EPI_ISL_414642          | 8/3/2020  |  |  |  | 315 |
| EPI_ISL_414643 | HCOV-19/FINLAND/FIN-508/2020 EPI_ISL_414643          | 7/3/2020  |  |  |  | 316 |
| EPI_ISL_414646 | HCOV-19/FINLAND/FIN-266/2020 EPI_ISL_414646          | 4/3/2020  |  |  |  | 317 |
| EPI_ISL_414648 | HCOV-19/USA/CA-PC101P/2020 EPI_ISL_414648            | 11/3/2020 |  |  |  | 318 |
| EPI_ISL_415105 | HCOV-19/BRAZIL/BA-312/2020 EPI_ISL_415105            | 4/3/2020  |  |  |  | 319 |
| EPI_ISL_415150 | HCOV-19/ENGLAND/20110003506/2020 EPI_ISL_415150      | 9/3/2020  |  |  |  | 320 |
| EPI_ISL_415151 | HCOV-19/USA/NY2-PV08100/2020 EPI_ISL_415151          | 4/3/2020  |  |  |  | 321 |
| EPI_ISL_415152 | HCOV-19/PANAMA/328677/2020 EPI_ISL_415152            | 6/3/2020  |  |  |  | 322 |
| EPI_ISL_415153 | HCOV-19/BELGIUM/VLM-03011/2020 EPI_ISL_415153        | 3/3/2020  |  |  |  | 323 |
| EPI_ISL_415460 | HCOV-19/NETHERLANDS/FLEVOLAND_1/2020 EPI_ISL_415460  | 9/3/2020  |  |  |  | 324 |
| EPI_ISL_415461 | HCOV-19/NETHERLANDS/GELDERLAND_1/2020 EPI_ISL_415461 | 10/3/2020 |  |  |  | 325 |
| EPI_ISL_415462 | HCOV-19/NETHERLANDS/GELDERLAND_2/2020 EPI_ISL_415462 | 9/3/2020  |  |  |  | 326 |
| EPI_ISL_415463 | HCOV-19/NETHERLANDS/GELDERLAND_3/2020 EPI_ISL_415463 | 9/3/2020  |  |  |  | 327 |
| EPI_ISL_415465 | HCOV-19/NETHERLANDS/NA_1/2020 EPI_ISL_415465         | 10/3/2020 |  |  |  | 328 |
| EPI_ISL_415466 | HCOV-19/NETHERLANDS/NA_10/2020 EPI_ISL_415466        | 9/3/2020  |  |  |  | 329 |
| EPI_ISL_415467 | HCOV-19/NETHERLANDS/NA_11/2020 EPI_ISL_415467        | 10/3/2020 |  |  |  | 330 |
| EPI_ISL_415468 | HCOV-19/NETHERLANDS/NA_12/2020 EPI_ISL_415468        | 10/3/2020 |  |  |  | 331 |
| EPI_ISL_415469 | HCOV-19/NETHERLANDS/NA_13/2020 EPI_ISL_415469        | 10/3/2020 |  |  |  | 332 |
| EPI_ISL_415470 | HCOV-19/NETHERLANDS/NA_14/2020 EPI_ISL_415470        | 10/3/2020 |  |  |  | 333 |
| EPI_ISL_415471 | HCOV-19/NETHERLANDS/NA_15/2020 EPI_ISL_415471        | 11/3/2020 |  |  |  | 334 |
| EPI_ISL_415472 | HCOV-19/NETHERLANDS/NA_16/2020 EPI_ISL_415472        | 11/3/2020 |  |  |  | 335 |
| EPI_ISL_415473 | HCOV-19/NETHERLANDS/NA_17/2020 EPI_ISL_415473        | 9/3/2020  |  |  |  | 336 |

|                |                                                         |           |  |  |  |     |
|----------------|---------------------------------------------------------|-----------|--|--|--|-----|
| EPI_ISL_415474 | HCOV-19/NETHERLANDS/NA_18/2020 EPI_ISL_415474           | 9/3/2020  |  |  |  | 337 |
| EPI_ISL_415475 | HCOV-19/NETHERLANDS/NA_19/2020 EPI_ISL_415475           | 12/3/2020 |  |  |  | 338 |
| EPI_ISL_415476 | HCOV-19/NETHERLANDS/NA_2/2020 EPI_ISL_415476            | 10/3/2020 |  |  |  | 339 |
| EPI_ISL_415478 | HCOV-19/NETHERLANDS/NA_21/2020 EPI_ISL_415478           | 8/3/2020  |  |  |  | 340 |
| EPI_ISL_415480 | HCOV-19/NETHERLANDS/NA_23/2020 EPI_ISL_415480           | 9/3/2020  |  |  |  | 341 |
| EPI_ISL_415481 | HCOV-19/NETHERLANDS/NA_24/2020 EPI_ISL_415481           | 8/3/2020  |  |  |  | 342 |
| EPI_ISL_415482 | HCOV-19/NETHERLANDS/NA_25/2020 EPI_ISL_415482           | 9/3/2020  |  |  |  | 343 |
| EPI_ISL_415483 | HCOV-19/NETHERLANDS/NA_26/2020 EPI_ISL_415483           | 9/3/2020  |  |  |  | 344 |
| EPI_ISL_415484 | HCOV-19/NETHERLANDS/NA_27/2020 EPI_ISL_415484           | 13/3/2020 |  |  |  | 345 |
| EPI_ISL_415485 | HCOV-19/NETHERLANDS/NA_28/2020 EPI_ISL_415485           | 12/3/2020 |  |  |  | 346 |
| EPI_ISL_415486 | HCOV-19/NETHERLANDS/NA_29/2020 EPI_ISL_415486           | 13/3/2020 |  |  |  | 347 |
| EPI_ISL_415487 | HCOV-19/NETHERLANDS/NA_30/2020 EPI_ISL_415487           | 13/3/2020 |  |  |  | 348 |
| EPI_ISL_415488 | HCOV-19/NETHERLANDS/NA_31/2020 EPI_ISL_415488           | 13/3/2020 |  |  |  | 349 |
| EPI_ISL_415491 | HCOV-19/NETHERLANDS/NA_34/2020 EPI_ISL_415491           | 7/3/2020  |  |  |  | 350 |
| EPI_ISL_415492 | HCOV-19/NETHERLANDS/NA_35/2020 EPI_ISL_415492           | 10/3/2020 |  |  |  | 351 |
| EPI_ISL_415495 | HCOV-19/NETHERLANDS/NA_6/2020 EPI_ISL_415495            | 10/3/2020 |  |  |  | 352 |
| EPI_ISL_415496 | HCOV-19/NETHERLANDS/NA_7/2020 EPI_ISL_415496            | 9/3/2020  |  |  |  | 353 |
| EPI_ISL_415497 | HCOV-19/NETHERLANDS/NA_8/2020 EPI_ISL_415497            | 9/3/2020  |  |  |  | 354 |
| EPI_ISL_415498 | HCOV-19/NETHERLANDS/NA_9/2020 EPI_ISL_415498            | 9/3/2020  |  |  |  | 355 |
| EPI_ISL_415502 | HCOV-19/NETHERLANDS/NOORDBRABANT_45/2020 EPI_ISL_415502 | 9/3/2020  |  |  |  | 356 |
| EPI_ISL_415511 | HCOV-19/NETHERLANDS/NOORDBRABANT_55/2020 EPI_ISL_415511 | 9/3/2020  |  |  |  | 357 |
| EPI_ISL_415512 | HCOV-19/NETHERLANDS/NOORDBRABANT_56/2020 EPI_ISL_415512 | 9/3/2020  |  |  |  | 358 |
| EPI_ISL_415514 | HCOV-19/NETHERLANDS/NOORDBRABANT_58/2020 EPI_ISL_415514 | 11/3/2020 |  |  |  | 359 |
| EPI_ISL_415515 | HCOV-19/NETHERLANDS/NOORDBRABANT_59/2020 EPI_ISL_415515 | 11/3/2020 |  |  |  | 360 |
| EPI_ISL_415525 | HCOV-19/NETHERLANDS/NOORDHOLLAND_3/2020 EPI_ISL_415525  | 12/3/2020 |  |  |  | 361 |
| EPI_ISL_415526 | HCOV-19/NETHERLANDS/UTRECHT_17/2020 EPI_ISL_415526      | 10/3/2020 |  |  |  | 362 |
| EPI_ISL_415527 | HCOV-19/NETHERLANDS/UTRECHT_18/2020 EPI_ISL_415527      | 12/3/2020 |  |  |  | 363 |
| EPI_ISL_415529 | HCOV-19/NETHERLANDS/ZUIDHOLLAND_25/2020 EPI_ISL_415529  | 9/3/2020  |  |  |  | 364 |
| EPI_ISL_415530 | HCOV-19/NETHERLANDS/ZUIDHOLLAND_26/2020 EPI_ISL_415530  | 9/3/2020  |  |  |  | 365 |
| EPI_ISL_415531 | HCOV-19/NETHERLANDS/ZUIDHOLLAND_27/2020 EPI_ISL_415531  | 9/3/2020  |  |  |  | 366 |
| EPI_ISL_415532 | HCOV-19/NETHERLANDS/ZUIDHOLLAND_28/2020 EPI_ISL_415532  | 9/3/2020  |  |  |  | 367 |
| EPI_ISL_415533 | HCOV-19/NETHERLANDS/ZUIDHOLLAND_29/2020 EPI_ISL_415533  | 9/3/2020  |  |  |  | 368 |
| EPI_ISL_415535 | HCOV-19/NETHERLANDS/ZUIDHOLLAND_31/2020 EPI_ISL_415535  | 12/3/2020 |  |  |  | 369 |
| EPI_ISL_415539 | HCOV-19/USA/UPHL-01/2020 EPI_ISL_415539                 | 13/3/2020 |  |  |  | 370 |
| EPI_ISL_415541 | HCOV-19/USA/UPHL-03/2020 EPI_ISL_415541                 | 13/3/2020 |  |  |  | 371 |
| EPI_ISL_415542 | HCOV-19/USA/UPHL-04/2020 EPI_ISL_415542                 | 13/3/2020 |  |  |  | 372 |
| EPI_ISL_415543 | HCOV-19/USA/UPHL-05/2020 EPI_ISL_415543                 | 13/3/2020 |  |  |  | 373 |
| EPI_ISL_415544 | HCOV-19/USA/UPHL-06/2020 EPI_ISL_415544                 | 13/3/2020 |  |  |  | 374 |
| EPI_ISL_415583 | HCOV-19/CANADA/BC_40860/2020 EPI_ISL_415583             | 3/3/2020  |  |  |  | 375 |
| EPI_ISL_415588 | HCOV-19/CANADA/BC_83109/2020 EPI_ISL_415588             | 5/3/2020  |  |  |  | 376 |
| EPI_ISL_415591 | HCOV-19/USA/WA-UW63/2020 EPI_ISL_415591                 | 10/3/2020 |  |  |  | 377 |
| EPI_ISL_415592 | HCOV-19/USA/WA-UW64/2020 EPI_ISL_415592                 | 9/3/2020  |  |  |  | 378 |
| EPI_ISL_415594 | HCOV-19/USA/WA-UW66/2020 EPI_ISL_415594                 | 10/3/2020 |  |  |  | 379 |
| EPI_ISL_415595 | HCOV-19/USA/WA-UW67/2020 EPI_ISL_415595                 | 9/3/2020  |  |  |  | 380 |
| EPI_ISL_415596 | HCOV-19/USA/WA-UW68/2020 EPI_ISL_415596                 | 9/3/2020  |  |  |  | 381 |
| EPI_ISL_415597 | HCOV-19/USA/WA-UW69/2020 EPI_ISL_415597                 | 10/3/2020 |  |  |  | 382 |
| EPI_ISL_415598 | HCOV-19/USA/WA-UW70/2020 EPI_ISL_415598                 | 10/3/2020 |  |  |  | 383 |
| EPI_ISL_415599 | HCOV-19/USA/WA-UW71/2020 EPI_ISL_415599                 | 9/3/2020  |  |  |  | 384 |
| EPI_ISL_415600 | HCOV-19/USA/WA-UW72/2020 EPI_ISL_415600                 | 9/3/2020  |  |  |  | 385 |



|                |                                                  |           |  |  |  |     |
|----------------|--------------------------------------------------|-----------|--|--|--|-----|
| EPI_ISL_415601 | HCOV-19/USA/WA-UW73/2020 EPI_ISL_415601          | 10/3/2020 |  |  |  | 386 |
| EPI_ISL_415602 | HCOV-19/USA/WA-UW74/2020 EPI_ISL_415602          | 10/3/2020 |  |  |  | 387 |
| EPI_ISL_415603 | HCOV-19/USA/WA-UW75/2020 EPI_ISL_415603          | 10/3/2020 |  |  |  | 388 |
| EPI_ISL_415604 | HCOV-19/USA/WA-UW76/2020 EPI_ISL_415604          | 10/3/2020 |  |  |  | 389 |
| EPI_ISL_415605 | HCOV-19/USA/WA-UW40/2020 EPI_ISL_415605          | 5/3/2020  |  |  |  | 390 |
| EPI_ISL_415606 | HCOV-19/USA/WA-UW41/2020 EPI_ISL_415606          | 8/3/2020  |  |  |  | 391 |
| EPI_ISL_415608 | HCOV-19/USA/WA-UW43/2020 EPI_ISL_415608          | 8/3/2020  |  |  |  | 392 |
| EPI_ISL_415609 | HCOV-19/USA/WA-UW44/2020 EPI_ISL_415609          | 8/3/2020  |  |  |  | 393 |
| EPI_ISL_415611 | HCOV-19/USA/WA-UW46/2020 EPI_ISL_415611          | 9/3/2020  |  |  |  | 394 |
| EPI_ISL_415613 | HCOV-19/USA/WA-UW48/2020 EPI_ISL_415613          | 9/3/2020  |  |  |  | 395 |
| EPI_ISL_415614 | HCOV-19/USA/WA-UW49/2020 EPI_ISL_415614          | 9/3/2020  |  |  |  | 396 |
| EPI_ISL_415615 | HCOV-19/USA/WA-UW50/2020 EPI_ISL_415615          | 8/3/2020  |  |  |  | 397 |
| EPI_ISL_415616 | HCOV-19/USA/WA-UW51/2020 EPI_ISL_415616          | 8/3/2020  |  |  |  | 398 |
| EPI_ISL_415617 | HCOV-19/USA/WA-UW52/2020 EPI_ISL_415617          | 9/3/2020  |  |  |  | 399 |
| EPI_ISL_415619 | HCOV-19/USA/WA-UW54/2020 EPI_ISL_415619          | 9/3/2020  |  |  |  | 400 |
| EPI_ISL_415620 | HCOV-19/USA/WA-UW55/2020 EPI_ISL_415620          | 9/3/2020  |  |  |  | 401 |
| EPI_ISL_415621 | HCOV-19/USA/WA-UW56/2020 EPI_ISL_415621          | 9/3/2020  |  |  |  | 402 |
| EPI_ISL_415622 | HCOV-19/USA/WA-UW57/2020 EPI_ISL_415622          | 9/3/2020  |  |  |  | 403 |
| EPI_ISL_415624 | HCOV-19/USA/WA-UW59/2020 EPI_ISL_415624          | 9/3/2020  |  |  |  | 404 |
| EPI_ISL_415625 | HCOV-19/USA/WA-UW60/2020 EPI_ISL_415625          | 9/3/2020  |  |  |  | 405 |
| EPI_ISL_415627 | HCOV-19/USA/WA-UW62/2020 EPI_ISL_415627          | 9/3/2020  |  |  |  | 406 |
| EPI_ISL_415629 | HCOV-19/SCOTLAND/EDB004/2020 EPI_ISL_415629      | 4/3/2020  |  |  |  | 407 |
| EPI_ISL_415630 | HCOV-19/SCOTLAND/CVR07/2020 EPI_ISL_415630       | 9/3/2020  |  |  |  | 408 |
| EPI_ISL_415631 | HCOV-19/SCOTLAND/CVR10/2020 EPI_ISL_415631       | 10/3/2020 |  |  |  | 409 |
| EPI_ISL_415640 | HCOV-19/SCOTLAND/EDB003/2020 EPI_ISL_415640      | 8/3/2020  |  |  |  | 410 |
| EPI_ISL_415642 | HCOV-19/GEORGIA/TB-477/2020 EPI_ISL_415642       | 10/3/2020 |  |  |  | 411 |
| EPI_ISL_415643 | HCOV-19/GEORGIA/TB-468/2020 EPI_ISL_415643       | 10/3/2020 |  |  |  | 412 |
| EPI_ISL_415646 | HCOV-19/DENMARK/SSI-101/2020 EPI_ISL_415646      | 3/3/2020  |  |  |  | 413 |
| EPI_ISL_415647 | HCOV-19/DENMARK/SSI-102/2020_ EPI_ISL_415647     | 3/3/2020  |  |  |  | 414 |
| EPI_ISL_415648 | HCOV-19/DENMARK/SSI-104/2020 EPI_ISL_415648      | 3/3/2020  |  |  |  | 415 |
| EPI_ISL_415649 | HCOV-19/FRANCE/HF2039/2020 EPI_ISL_415649        | 5/3/2020  |  |  |  | 416 |
| EPI_ISL_415651 | HCOV-19/FRANCE/BFC2094/2020 EPI_ISL_415651       | 5/3/2020  |  |  |  | 417 |
| EPI_ISL_415652 | HCOV-19/FRANCE/BFC2147/2020 EPI_ISL_415652       | 5/3/2020  |  |  |  | 418 |
| EPI_ISL_415654 | HCOV-19/FRANCE/HF2174/2020 EPI_ISL_415654        | 9/3/2020  |  |  |  | 419 |
| EPI_ISL_415655 | HCOV-19/WALES/PHW27/2020 EPI_ISL_415655          | 12/3/2020 |  |  |  | 420 |
| EPI_ISL_415656 | HCOV-19/WALES/PHW33/2020 EPI_ISL_415656          | 12/3/2020 |  |  |  | 421 |
| EPI_ISL_415657 | HCOV-19/WALES/PHW37/2020 EPI_ISL_415657          | 12/3/2020 |  |  |  | 422 |
| EPI_ISL_415658 | HCOV-19/CHILE/SANTIAGO_OP2D1/2020 EPI_ISL_415658 | 6/3/2020  |  |  |  | 423 |
| EPI_ISL_415659 | HCOV-19/WALES/PHW28/2020 EPI_ISL_415659          | 12/3/2020 |  |  |  | 424 |
| EPI_ISL_415660 | HCOV-19/CHILE/SANTIAGO_OP3D1/2020 EPI_ISL_415660 | 7/3/2020  |  |  |  | 425 |
| EPI_ISL_415661 | HCOV-19/CHILE/SANTIAGO_OP4D1/2020 EPI_ISL_415661 | 8/3/2020  |  |  |  | 426 |
| EPI_ISL_415692 | HCOV-19/FRANCE/HF2039/2020 EPI_ISL_415692        | 5/3/2020  |  |  |  | 427 |
| EPI_ISL_415694 | HCOV-19/FRANCE/BFC2094/2020 EPI_ISL_415694       | 5/3/2020  |  |  |  | 428 |
| EPI_ISL_415695 | HCOV-19/FRANCE/BFC2147/2020 EPI_ISL_415695       | 5/3/2020  |  |  |  | 429 |
| EPI_ISL_415697 | HCOV-19/FRANCE/HF2174/2020 EPI_ISL_415697        | 9/3/2020  |  |  |  | 430 |
| EPI_ISL_415704 | HCOV-19/SWITZERLAND/BE2536/2020 EPI_ISL_415704   | 4/3/2020  |  |  |  | 431 |
| EPI_ISL_415705 | HCOV-19/SWITZERLAND/GE4135/2020 EPI_ISL_415705   | 6/3/2020  |  |  |  | 432 |
| EPI_ISL_415706 | HCOV-19/SWITZERLAND/GE062072020 EPI_ISL_415706   | 6/3/2020  |  |  |  | 433 |
| EPI_ISL_415707 | HCOV-19/SWITZERLAND/GE6679/2020 EPI_ISL_415707   | 8/3/2020  |  |  |  | 434 |

|                |                                                           |           |  |  |  |     |
|----------------|-----------------------------------------------------------|-----------|--|--|--|-----|
| EPI_ISL_415708 | HCOV-19/SWITZERLAND/GE4984/2020 EPI_ISL_415708            | 7/3/2020  |  |  |  | 435 |
| EPI_ISL_415710 | HCOV-19/RUSSIA/STPETERSBURG-3524/2020 EPI_ISL_415710      | 15/3/2020 |  |  |  | 436 |
| EPI_ISL_415787 | HCOV-19/PERU/O10/2020 EPI_ISL_415787                      | 10/3/2020 |  |  |  | 437 |
| EPI_ISL_415920 | HCOV-19/WALES/PHW32/2020 EPI_ISL_415920                   | 12/3/2020 |  |  |  | 438 |
| EPI_ISL_416024 | HCOV-19/WALES/PHW35/2020 EPI_ISL_416024                   | 11/3/2020 |  |  |  | 439 |
| EPI_ISL_416026 | HCOV-19/WALES/PHW21/2020 EPI_ISL_416026                   | 11/3/2020 |  |  |  | 440 |
| EPI_ISL_416028 | HCOV-19/BRAZIL/SPBR-07/2020 EPI_ISL_416028                | 3/3/2020  |  |  |  | 441 |
| EPI_ISL_416029 | HCOV-19/BRAZIL/SPBR-08/2020 EPI_ISL_416029                | 4/3/2020  |  |  |  | 442 |
| EPI_ISL_416031 | HCOV-19/BRAZIL/SPBR-09/2020 EPI_ISL_416031                | 4/3/2020  |  |  |  | 443 |
| EPI_ISL_416032 | HCOV-19/BRAZIL/SPBR-10/2020 EPI_ISL_416032                | 4/3/2020  |  |  |  | 444 |
| EPI_ISL_416033 | HCOV-19/BRAZIL/SPBR-11/2020 EPI_ISL_416033                | 3/3/2020  |  |  |  | 445 |
| EPI_ISL_416034 | HCOV-19/BRAZIL/SPBR-12/2020 EPI_ISL_416034                | 4/3/2020  |  |  |  | 446 |
| EPI_ISL_416035 | HCOV-19/BRAZIL/SPBR-13/2020 EPI_ISL_416035                | 5/3/2020  |  |  |  | 447 |
| EPI_ISL_416036 | HCOV-19/BRAZIL/SPBR-14/2020 EPI_ISL_416036                | 5/3/2020  |  |  |  | 448 |
| EPI_ISL_416141 | HCOV-19/DENMARK/SSI-09/2020 EPI_ISL_416141                | 3/3/2020  |  |  |  | 449 |
| EPI_ISL_416413 | HCOV-19/AUSTRALIA/VIC05/2020 EPI_ISL_416413               | 5/3/2020  |  |  |  | 450 |
| EPI_ISL_416414 | HCOV-19/AUSTRALIA/VIC06/2020 EPI_ISL_416414               | 6/3/2020  |  |  |  | 451 |
| EPI_ISL_416426 | HCOV-19/HUNGARY/MBL1/2020 EPI_ISL_416426                  | 17/3/2020 |  |  |  | 452 |
| EPI_ISL_416428 | HCOV-19/VIETNAM/39607/2020 EPI_ISL_416428                 | 7/3/2020  |  |  |  | 453 |
| EPI_ISL_416430 | HCOV-19/VIETNAM/CM295/2020 EPI_ISL_416430                 | 6/3/2020  |  |  |  | 454 |
| EPI_ISL_416431 | HCOV-19/VIETNAM/CM296/2020 EPI_ISL_416431                 | 6/3/2020  |  |  |  | 455 |
| EPI_ISL_416432 | HCOV-19/SAUDI_ARABIA/KAIMRC-ALGHORIBI/2020 EPI_ISL_416432 | 7/3/2020  |  |  |  | 456 |
| EPI_ISL_416433 | HCOV-19/USA/WA-UW77/2020 EPI_ISL_416433                   | 10/3/2020 |  |  |  | 457 |
| EPI_ISL_416434 | HCOV-19/USA/WA-UW78/2020 EPI_ISL_416434                   | 10/3/2020 |  |  |  | 458 |
| EPI_ISL_416435 | HCOV-19/USA/WA-UW79/2020 EPI_ISL_416435                   | 10/3/2020 |  |  |  | 459 |
| EPI_ISL_416436 | HCOV-19/USA/WA-UW80/2020 EPI_ISL_416436                   | 10/3/2020 |  |  |  | 460 |
| EPI_ISL_416437 | HCOV-19/USA/WA-UW81/2020 EPI_ISL_416437                   | 10/3/2020 |  |  |  | 461 |
| EPI_ISL_416438 | HCOV-19/USA/WA-UW82/2020 EPI_ISL_416438                   | 10/3/2020 |  |  |  | 462 |
| EPI_ISL_416439 | HCOV-19/USA/WA-UW83/2020 EPI_ISL_416439                   | 10/3/2020 |  |  |  | 463 |
| EPI_ISL_416440 | HCOV-19/USA/WA-UW84/2020 EPI_ISL_416440                   | 10/3/2020 |  |  |  | 464 |
| EPI_ISL_416441 | HCOV-19/USA/WA-UW85/2020 EPI_ISL_416441                   | 10/3/2020 |  |  |  | 465 |
| EPI_ISL_416442 | HCOV-19/USA/WA-UW86/2020 EPI_ISL_416442                   | 10/3/2020 |  |  |  | 466 |
| EPI_ISL_416443 | HCOV-19/USA/WA-UW87/2020 EPI_ISL_416443                   | 10/3/2020 |  |  |  | 467 |
| EPI_ISL_416444 | HCOV-19/USA/WA-UW88/2020 EPI_ISL_416444                   | 10/3/2020 |  |  |  | 468 |
| EPI_ISL_416445 | HCOV-19/USA/WA-UW89/2020 EPI_ISL_416445                   | 10/3/2020 |  |  |  | 469 |
| EPI_ISL_416447 | HCOV-19/USA/WA-UW91/2020 EPI_ISL_416447                   | 10/3/2020 |  |  |  | 470 |
| EPI_ISL_416448 | HCOV-19/USA/WA-UW92/2020 EPI_ISL_416448                   | 11/3/2020 |  |  |  | 471 |
| EPI_ISL_416449 | HCOV-19/USA/WA-UW93/2020 EPI_ISL_416449                   | 11/3/2020 |  |  |  | 472 |
| EPI_ISL_416450 | HCOV-19/USA/WA-UW94/2020 EPI_ISL_416450                   | 11/3/2020 |  |  |  | 473 |
| EPI_ISL_416451 | HCOV-19/USA/WA-UW95/2020 EPI_ISL_416451                   | 10/3/2020 |  |  |  | 474 |
| EPI_ISL_416452 | HCOV-19/USA/WA-UW96/2020 EPI_ISL_416452                   | 10/3/2020 |  |  |  | 475 |
| EPI_ISL_416453 | HCOV-19/USA/WA-UW36/2020 EPI_ISL_416453                   | 7/3/2020  |  |  |  | 476 |
| EPI_ISL_416454 | HCOV-19/USA/WA-UW37/2020 EPI_ISL_416454                   | 6/3/2020  |  |  |  | 477 |
| EPI_ISL_416455 | HCOV-19/USA/WA-UW38/2020 EPI_ISL_416455                   | 7/3/2020  |  |  |  | 478 |
| EPI_ISL_416456 | HCOV-19/USA/WA-UW39/2020 EPI_ISL_416456                   | 6/3/2020  |  |  |  | 479 |
| EPI_ISL_416457 | HCOV-19/USA/CA-MG0987/2020 EPI_ISL_416457                 | 18/3/2020 |  |  |  | 480 |
